# Supplementary material for: Prognostic Significance of Lymphocyte Infiltration and a Stromal Immunostaining of a Bladder Cancer Associated Diagnostic Panel in Urothelial Carcinoma
Source: MDPI journal article supplement (doi:10.3390/diagnostics10010014), 2019-12-28
Supplement: s1 [file s1]

CD3 + CTL - Tonsil

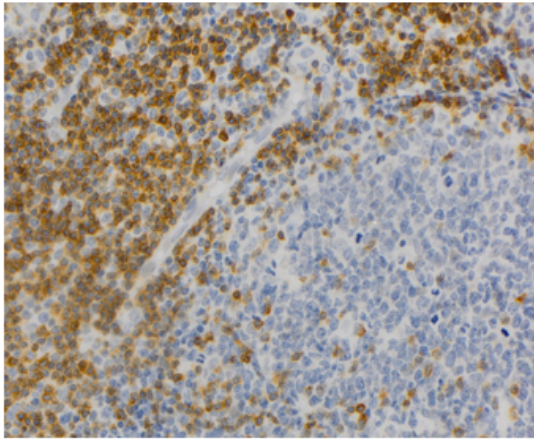

CD3 + CTL – Lymph Node

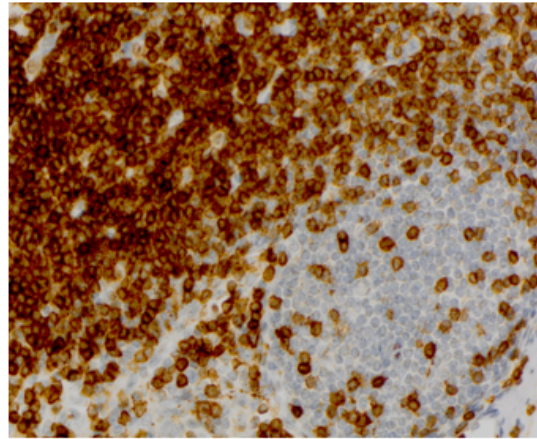

CD68 + CTL - Spleen

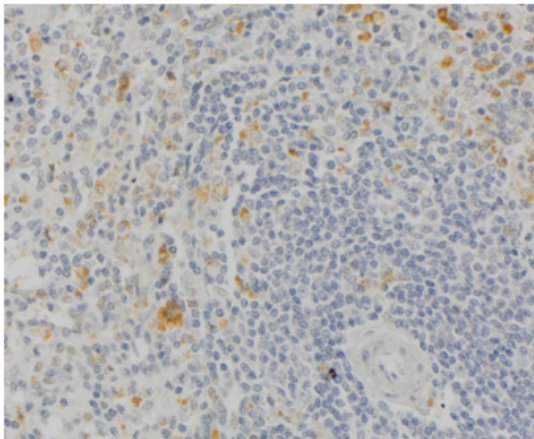

CD68 + CTL – Lymph Node

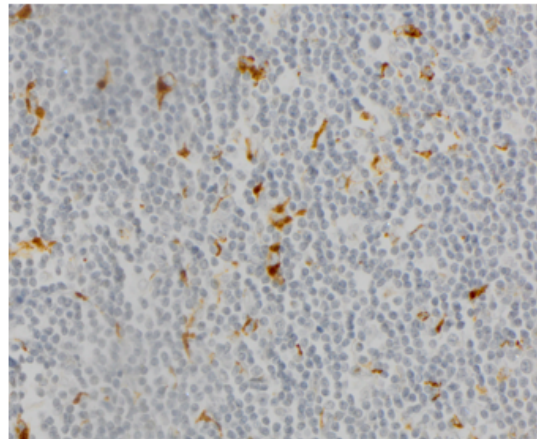

**Supplemental Figure S1.** Progression-free survival analysis of 213 patients with bladder cancer. Progression-free survival according to immunostaining status of > 5 targets from diagnostic signature, 3-5 targets from diagnostic signature and < 3 targets from diagnostic signature with or without infiltration of CD3+ and CD68+ cells.
